# Supplementary material for: Health layering of self-help groups: impacts on reproductive, maternal, newborn and child health and nutrition in Bihar, India
Source: PubMed Central journal article supplement (PMC7759023; doi:10.7189/jogh.10.021007), 2020-12
Supplement: jogh-10-021007-s001.pdf [file jogh-10-021007-s001.pdf]

**Health layering of self-help groups: impacts on reproductive, maternal, newborn and child health and nutrition in Bihar, India**

Supplemental Figure 1. Health Layering upon Self Help groups (SHGs) in Bihar, India 2014-2017

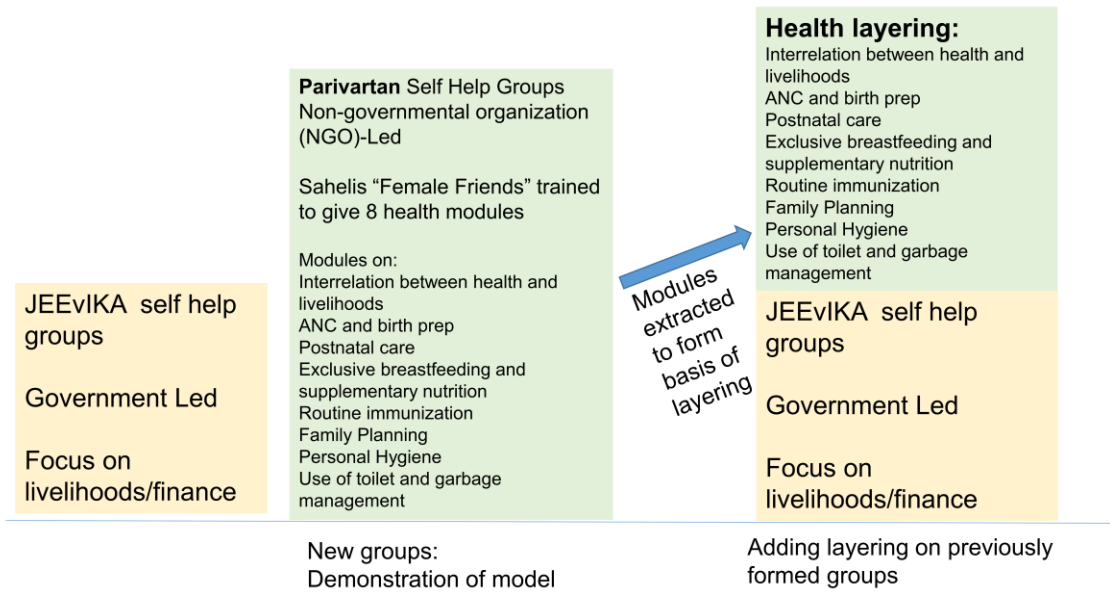

| Supplemental Table 1a. Effect of SHG interventions on reproductive, maternal, newborn and child health and nutrition indicators by continuum of care, CHS round 6 (2014), comparing <i>Parivartan</i> SHG members vs non-members, 64 blocks (OR +/- 95% CI) |                          |                                    |                       |                     |                      |                      |                                                                         |                                                                        |                                                                        |
|-------------------------------------------------------------------------------------------------------------------------------------------------------------------------------------------------------------------------------------------------------------|--------------------------|------------------------------------|-----------------------|---------------------|----------------------|----------------------|-------------------------------------------------------------------------|------------------------------------------------------------------------|------------------------------------------------------------------------|
| Round 6 (2014)                                                                                                                                                                                                                                              |                          |                                    |                       |                     |                      |                      |                                                                         |                                                                        |                                                                        |
| Description                                                                                                                                                                                                                                                 | Continuum of care domain | Delivery Platform                  | Effect                | Odds Ratio Estimate | Lower 95% Confidence | Upper 95% Confidence | Higher odds for SHG in <i>Parivartan</i> blocks compared to non members | Equal odds for SHG in <i>Parivartan</i> blocks compared to non members | Lower odds for SHG in <i>Parivartan</i> blocks compared to non members |
| 4+ ANC visits                                                                                                                                                                                                                                               | Antenatal Care           | Facility/Outreach Service Delivery | Parivartan vs non SHG | 0.786               | 0.425                | 1.456                | 0                                                                       | 1                                                                      | 0                                                                      |
| Had at least one ANC exam if reporting any ANC visit                                                                                                                                                                                                        | Antenatal Care           | Facility/Outreach Service Delivery | Parivartan vs non SHG | 2.104               | 0.289                | 15.29                | 0                                                                       | 1                                                                      | 0                                                                      |
| Admitted to hospital for complication                                                                                                                                                                                                                       | Antenatal Care           | Facility/Outreach Service Delivery | Parivartan vs non SHG | 2.104               | 0.289                | 15.29                | 0                                                                       | 1                                                                      | 0                                                                      |
| Received at least 90 IFA tablets during pregnancy                                                                                                                                                                                                           | Antenatal Care           | Facility/Outreach Service Delivery | Parivartan vs non SHG | 1.723               | 1.183                | 2.508                | 1                                                                       | 0                                                                      | 0                                                                      |
| FLW antenatal home visit to discuss mother's or baby's health                                                                                                                                                                                               | Antenatal Care           | Frontline worker Performance       | Parivartan vs non SHG | 2.586               | 1.88                 | 3.557                | 1                                                                       | 0                                                                      | 0                                                                      |
| Any FLW visit during last trimester                                                                                                                                                                                                                         | Antenatal Care           | Frontline worker Performance       | Parivartan vs non SHG | 2.567               | 1.87                 | 3.524                | 1                                                                       | 0                                                                      | 0                                                                      |
| FLW advised on hand-washing by delivery attendant                                                                                                                                                                                                           | Antenatal Care           | Frontline worker Performance       | Parivartan vs non SHG | 3.661               | 2.442                | 5.49                 | 1                                                                       | 0                                                                      | 0                                                                      |
| FLW advised on danger of excessive bleeding                                                                                                                                                                                                                 | Antenatal Care           | Frontline worker Performance       | Parivartan vs non SHG | 3.499               | 2.33                 | 5.255                | 1                                                                       | 0                                                                      | 0                                                                      |
| FLW advised on danger of convulsions                                                                                                                                                                                                                        | Antenatal Care           | Frontline worker Performance       | Parivartan vs non SHG | 2.504               | 1.565                | 4.005                | 1                                                                       | 0                                                                      | 0                                                                      |
| FLW advised on danger of prolonged or difficult labor                                                                                                                                                                                                       | Antenatal Care           | Frontline worker Performance       | Parivartan vs non SHG | 3.095               | 2.074                | 4.617                | 1                                                                       | 0                                                                      | 0                                                                      |
| FLW advised on danger of swelling of face or hands                                                                                                                                                                                                          | Antenatal Care           | Frontline worker Performance       | Parivartan vs non SHG | 3.623               | 2.478                | 5.297                | 1                                                                       | 0                                                                      | 0                                                                      |
| FLW advised on reasons to deliver in a hospital                                                                                                                                                                                                             | Antenatal Care           | Frontline worker Performance       | Parivartan vs non SHG | 1.444               | 0.84                 | 2.48                 | 0                                                                       | 1                                                                      | 0                                                                      |

|                                                        |                |                                    |                       |       |       |       |   |   |   |
|--------------------------------------------------------|----------------|------------------------------------|-----------------------|-------|-------|-------|---|---|---|
| FLW advised on saving money in case of emergency       | Antenatal Care | Frontline worker Performance       | Parivartan vs non SHG | 2.366 | 1.632 | 3.43  | 1 | 0 | 0 |
| Consumed 90+ IFA tablets                               | Antenatal Care | Mother's Behavior                  | Parivartan vs non SHG | 1.187 | 0.739 | 1.905 | 0 | 1 | 0 |
| Pregnancy registration in the first trimester          | Antenatal Care | Mother's Behavior                  | Parivartan vs non SHG | 2.018 | 1.481 | 2.749 | 1 | 0 | 0 |
| Sought care for complications                          | Antenatal Care | Mother's Behavior                  | Parivartan vs non SHG | 1.794 | 0.937 | 3.435 | 0 | 1 | 0 |
| Saved money                                            | Antenatal Care | Mother's Behavior                  | Parivartan vs non SHG | 1.639 | 1.112 | 2.416 | 1 | 0 | 0 |
| Chose a facility for delivery                          | Antenatal Care | Mother's Behavior                  | Parivartan vs non SHG | 2.117 | 1.474 | 3.04  | 1 | 0 | 0 |
| Chose a facility in case of emergency                  | Antenatal Care | Mother's Behavior                  | Parivartan vs non SHG | 1.2   | 0.848 | 1.698 | 0 | 1 | 0 |
| Arranged transportation to facility                    | Antenatal Care | Mother's Behavior                  | Parivartan vs non SHG | 0.916 | 0.657 | 1.279 | 0 | 1 | 0 |
| Delivery in a private facility (out of all deliveries) | Delivery       | Facility/Outreach Service Delivery | Parivartan vs non SHG | 0.66  | 0.377 | 1.154 | 0 | 1 | 0 |
| Caesarian-section for delivery                         | Delivery       | Facility/Outreach Service Delivery | Parivartan vs non SHG | 0.709 | 0.327 | 1.54  | 0 | 1 | 0 |
| Clean cloth was used for baby                          | Delivery       | Facility/Outreach Service Delivery | Parivartan vs non SHG | 1.807 | 0.545 | 5.988 | 0 | 1 | 0 |
| Clean thread was used to tie cord                      | Delivery       | Facility/Outreach Service Delivery | Parivartan vs non SHG | 0.522 | 0.181 | 1.509 | 0 | 1 | 0 |
| Baby immediately dried and wrapped                     | Delivery       | Mother's Behavior                  | Parivartan vs non SHG | 0.672 | 0.294 | 1.538 | 0 | 1 | 0 |
| Any FLW visits in the first week after delivery        | Postnatal Care | Frontline worker Performance       | Parivartan vs non SHG | 2.613 | 1.923 | 3.55  | 1 | 0 | 0 |
| 3+ FLW visits in the first week after delivery         | Postnatal Care | Frontline worker Performance       | Parivartan vs non SHG | 2.619 | 1.87  | 3.666 | 1 | 0 | 0 |
| FLW advised on neonatal danger signs                   | Postnatal Care | Frontline worker Performance       | Parivartan vs non SHG | 3.931 | 2.391 | 6.461 | 1 | 0 | 0 |
| FLW advised on delayed bathing                         | Postnatal Care | Frontline worker Performance       | Parivartan vs non SHG | 3.798 | 2.602 | 5.543 | 1 | 0 | 0 |
| FLW advised on skin to skin care                       | Postnatal Care | Frontline worker Performance       | Parivartan vs non SHG | 3.66  | 2.508 | 5.341 | 1 | 0 | 0 |

|                                                       |                 |                              |                       |       |       |        |   |   |   |
|-------------------------------------------------------|-----------------|------------------------------|-----------------------|-------|-------|--------|---|---|---|
| FLW advised on dry cord care                          | Postnatal Care  | Frontline worker Performance | Parivartan vs non SHG | 2.876 | 1.967 | 4.204  | 1 | 0 | 0 |
| Skin-to-skin care                                     | Postnatal Care  | Mother's Behavior            | Parivartan vs non SHG | 3.229 | 2.335 | 4.465  | 1 | 0 | 0 |
| Dry cord care                                         | Postnatal Care  | Mother's Behavior            | Parivartan vs non SHG | 2.819 | 2.028 | 3.919  | 1 | 0 | 0 |
| Care seeking for neonatal complications               | Postnatal Care  | Mother's Behavior            | Parivartan vs non SHG | 0.815 | 0.28  | 2.376  | 0 | 1 | 0 |
| FLW advised on early initiation of breastfeeding      | Nutrition       | Frontline worker Performance | Parivartan vs non SHG | 2.979 | 1.915 | 4.634  | 1 | 0 | 0 |
| FLW advised on exclusive breastfeeding                | Nutrition       | Frontline worker Performance | Parivartan vs non SHG | 3.405 | 2.245 | 5.162  | 1 | 0 | 0 |
| FLW advised on age to which to continue breastfeeding | Nutrition       | Frontline worker Performance | Parivartan vs non SHG | 5.578 | 3.533 | 8.807  | 1 | 0 | 0 |
| Immediate breastfeeding                               | Nutrition       | Mother's Behavior            | Parivartan vs non SHG | 2.703 | 1.874 | 3.899  | 1 | 0 | 0 |
| Exclusive breastfeeding in the past 24 hours          | Nutrition       | Mother's Behavior            | Parivartan vs non SHG | 2.604 | 1.711 | 3.963  | 1 | 0 | 0 |
| FLW reminded on vaccine information                   | Immunization    | Frontline worker Performance | Parivartan vs non SHG | 1.797 | 1.078 | 2.995  | 1 | 0 | 0 |
| FLW asked interest in having more children            | Family Planning | Frontline worker Performance | Parivartan vs non SHG | 2.273 | 1.493 | 3.461  | 1 | 0 | 0 |
| FLW asked risk of becoming pregnant                   | Family Planning | Frontline worker Performance | Parivartan vs non SHG | 2.039 | 1.359 | 3.061  | 1 | 0 | 0 |
| FLW advised on sterilization post-delivery            | Family Planning | Frontline worker Performance | Parivartan vs non SHG | 2.236 | 1.517 | 3.295  | 1 | 0 | 0 |
| FLW advised on use of PPIUD post-delivery             | Family Planning | Frontline worker Performance | Parivartan vs non SHG | 2.662 | 1.765 | 4.016  | 1 | 0 | 0 |
| Modern method of contraception used                   | Family Planning | Mother's Behavior            | Parivartan vs non SHG | 0.817 | 0.066 | 10.129 | 0 | 1 | 0 |
| Washed hands before feeding child                     | Sanitation      | Mother's Behavior            | Parivartan vs non SHG | 0.761 | 0.085 | 6.813  | 0 | 1 | 0 |
| Used soap or detergent when washing hands before feed | Sanitation      | Mother's Behavior            | Parivartan vs non SHG | 1.012 | 0.107 | 9.593  | 0 | 1 | 0 |

*Supplemental Table 1a Legend:*

All models presented were adjusted for age of the mother and the sex of the focal child. These models also accounted for the study's complex design by applying study weights. Abbreviations: ANC, antenatal care; CHS, Community-based Household Survey; CI Confidence Interval; DPT, diphtheria-pertussis-tetanus; FLW, frontline worker; HL, Health Layering; IFA, iron-folic acid; IPV, inactivated polio vaccine; OPV, oral polio vaccine; OR Odds Ratio; PPIUD, postpartum intrauterine device; SHG, self-help group

**Supplemental Table 1b. Effect of SHG interventions on reproductive, maternal, newborn and child health and nutrition indicators by continuum of care, CHS rounds 8-9 (2016-2017), comparing SHG members vs non-members in 37 blocks with JEEViKA+HL layering (OR +/- 95% CI).**

| Round 8 and 9, 2015-2017                                      |                          |                                    |                       |                     |                      |                      |                                                                                         |                                                                                           |                                                                                           |
|---------------------------------------------------------------|--------------------------|------------------------------------|-----------------------|---------------------|----------------------|----------------------|-----------------------------------------------------------------------------------------|-------------------------------------------------------------------------------------------|-------------------------------------------------------------------------------------------|
| Description                                                   | Continuum of care domain | Delivery Platform                  | Effect                | Odds Ratio Estimate | Lower 95% Confidence | Upper 95% Confidence | Higher odds for SHG in JEEViKA + Health after to implementation compared to non members | Equal odds for SHG in 37 JEEViKA + Health after to implementation compared to non members | Lower odds for SHG in 37 JEEViKA + Health after to implementation compared to non members |
| 4+ ANC visits                                                 | Antenatal Care           | Facility/Outreach Service Delivery | JEEViKA+HL vs non SHG | 0.808               | 0.639                | 1.023                | 0                                                                                       | 1                                                                                         | 0                                                                                         |
| Had at least one ANC exam if reporting any ANC visit          | Antenatal Care           | Facility/Outreach Service Delivery | JEEViKA+HL vs non SHG | 0.805               | 0.268                | 2.415                | 0                                                                                       | 1                                                                                         | 0                                                                                         |
| Admitted to hospital for complication                         | Antenatal Care           | Facility/Outreach Service Delivery | JEEViKA+HL vs non SHG | 0.805               | 0.268                | 2.415                | 0                                                                                       | 1                                                                                         | 0                                                                                         |
| Received at least 90 IFA tablets during pregnancy             | Antenatal Care           | Facility/Outreach Service Delivery | JEEViKA+HL vs non SHG | 0.932               | 0.573                | 1.518                | 0                                                                                       | 1                                                                                         | 0                                                                                         |
| FLW antenatal home visit to discuss mother's or baby's health | Antenatal Care           | Frontlineworker Performance        | JEEViKA+HL vs non SHG | 1.469               | 1.199                | 1.799                | 1                                                                                       | 0                                                                                         | 0                                                                                         |
| Any FLW visit during last trimester                           | Antenatal Care           | Frontlineworker Performance        | JEEViKA+HL vs non SHG | 1.378               | 1.116                | 1.7                  | 1                                                                                       | 0                                                                                         | 0                                                                                         |
| FLW advised on hand-washing by delivery attendant             | Antenatal Care           | Frontlineworker Performance        | JEEViKA+HL vs non SHG | 1.073               | 0.787                | 1.462                | 0                                                                                       | 1                                                                                         | 0                                                                                         |
| FLW advised on danger of excessive bleeding                   | Antenatal Care           | Frontlineworker Performance        | JEEViKA+HL vs non SHG | 0.977               | 0.666                | 1.433                | 0                                                                                       | 1                                                                                         | 0                                                                                         |
| FLW advised on danger of convulsions                          | Antenatal Care           | Frontlineworker Performance        | JEEViKA+HL vs non SHG | 0.936               | 0.579                | 1.515                | 0                                                                                       | 1                                                                                         | 0                                                                                         |
| FLW advised on danger of prolonged or difficult labor         | Antenatal Care           | Frontlineworker Performance        | JEEViKA+HL vs non SHG | 1.049               | 0.694                | 1.586                | 0                                                                                       | 1                                                                                         | 0                                                                                         |
| FLW advised on danger of swelling of face or hands            | Antenatal Care           | Frontlineworker Performance        | JEEViKA+HL vs non SHG | 1.158               | 0.798                | 1.679                | 0                                                                                       | 1                                                                                         | 0                                                                                         |
| FLW advised on reasons to deliver in a hospital               | Antenatal Care           | Frontlineworker Performance        | JEEViKA+HL vs non SHG | 1.639               | 1.022                | 2.629                | 1                                                                                       | 0                                                                                         | 0                                                                                         |
| FLW advised on saving                                         | Antenatal Care           | Frontlineworker Performance        | JEEViKA+HL vs non SHG | 1.187               | 0.864                | 1.63                 | 0                                                                                       | 1                                                                                         | 0                                                                                         |

|                                                        |                |                                    |                       |       |       |       |   |   |   |
|--------------------------------------------------------|----------------|------------------------------------|-----------------------|-------|-------|-------|---|---|---|
| money in case of emergency                             |                |                                    |                       |       |       |       |   |   |   |
| Consumed 90+ IFA tablets                               | Antenatal Care | Mother's Behavior                  | JEEViKA+HL vs non SHG | 0.854 | 0.474 | 1.538 | 0 | 1 | 0 |
| Pregnancy registration in the first trimester          | Antenatal Care | Mother's Behavior                  | JEEViKA+HL vs non SHG | 1.193 | 0.971 | 1.464 | 0 | 1 | 0 |
| Sought care for complications                          | Antenatal Care | Mother's Behavior                  | JEEViKA+HL vs non SHG | 0.911 | 0.709 | 1.17  | 0 | 1 | 0 |
| Saved money                                            | Antenatal Care | Mother's Behavior                  | JEEViKA+HL vs non SHG | 1.345 | 1.077 | 1.68  | 1 | 0 | 0 |
| Chose a facility for delivery                          | Antenatal Care | Mother's Behavior                  | JEEViKA+HL vs non SHG | 1.717 | 1.375 | 2.145 | 1 | 0 | 0 |
| Chose a facility in case of emergency                  | Antenatal Care | Mother's Behavior                  | JEEViKA+HL vs non SHG | 0.669 | 0.513 | 0.872 | 0 | 0 | 1 |
| Arranged transportation to facility                    | Antenatal Care | Mother's Behavior                  | JEEViKA+HL vs non SHG | 1.119 | 0.888 | 1.409 | 0 | 1 | 0 |
| Delivery in a private facility (out of all deliveries) | Delivery       | Facility/Outreach Service Delivery | JEEViKA+HL vs non SHG | 0.778 | 0.587 | 1.032 | 0 | 1 | 0 |
| Caesarian-section for delivery                         | Delivery       | Facility/Outreach Service Delivery | JEEViKA+HL vs non SHG | 0.821 | 0.547 | 1.232 | 0 | 1 | 0 |
| Clean cloth was used for baby                          | Delivery       | Facility/Outreach Service Delivery | JEEViKA+HL vs non SHG | 1.186 | 0.448 | 3.136 | 0 | 1 | 0 |
| Clean thread was used to tie cord                      | Delivery       | Facility/Outreach Service Delivery | JEEViKA+HL vs non SHG | 1.78  | 0.563 | 5.63  | 0 | 1 | 0 |
| Baby immediately dried and wrapped                     | Delivery       | Mother's Behavior                  | JEEViKA+HL vs non SHG | 0.794 | 0.462 | 1.364 | 0 | 1 | 0 |
| Any FLW visits in the first week after delivery        | Postnatal Care | Frontlineworker Performance        | JEEViKA+HL vs non SHG | 1.29  | 1.052 | 1.582 | 1 | 0 | 0 |
| 3+ FLW visits in the first week after delivery         | Postnatal Care | Frontlineworker Performance        | JEEViKA+HL vs non SHG | 1.152 | 0.849 | 1.564 | 0 | 1 | 0 |
| FLW advised on neonatal danger signs                   | Postnatal Care | Frontlineworker Performance        | JEEViKA+HL vs non SHG | 0.586 | 0.224 | 1.535 | 0 | 1 | 0 |
| FLW advised on delayed bathing                         | Postnatal Care | Frontlineworker Performance        | JEEViKA+HL vs non SHG | 1.19  | 0.876 | 1.617 | 0 | 1 | 0 |
| FLW advised on skin to skin care                       | Postnatal Care | Frontlineworker Performance        | JEEViKA+HL vs non SHG | 1.304 | 0.94  | 1.81  | 0 | 1 | 0 |
| FLW advised on dry cord care                           | Postnatal Care | Frontlineworker Performance        | JEEViKA+HL vs non SHG | 0.948 | 0.681 | 1.32  | 0 | 1 | 0 |
| Skin-to-skin care                                      | Postnatal Care | Mother's Behavior                  | JEEViKA+HL vs non SHG | 1.183 | 0.908 | 1.54  | 0 | 1 | 0 |
| Dry cord care                                          | Postnatal Care | Mother's Behavior                  | JEEViKA+HL vs non SHG | 1.072 | 0.872 | 1.319 | 0 | 1 | 0 |
| Care seeking for neonatal complications                | Postnatal Care | Mother's Behavior                  | JEEViKA+HL vs non SHG | 3.515 | 1.584 | 7.8   | 1 | 0 | 0 |
| FLW advised on early initiation of breastfeeding       | Nutrition      | Frontlineworker Performance        | JEEViKA+HL vs non SHG |       |       |       | 0 | 0 | 1 |

|                                                         |                 |                             |                       |       |       |       |   |   |   |
|---------------------------------------------------------|-----------------|-----------------------------|-----------------------|-------|-------|-------|---|---|---|
| FLW advised on exclusive breastfeeding                  | Nutrition       | Frontlineworker Performance | JEEViKA+HL vs non SHG | 1.286 | 0.952 | 1.738 | 0 | 1 | 0 |
| FLW advised on age to which to continuing breastfeeding | Nutrition       | Frontlineworker Performance | JEEViKA+HL vs non SHG | 1.199 | 0.881 | 1.631 | 0 | 1 | 0 |
| Immediate breastfeeding                                 | Nutrition       | Mother's Behavior           | JEEViKA+HL vs non SHG | 1.569 | 1.243 | 1.981 | 1 | 0 | 0 |
| Exclusive breastfeeding in the past 24 hours            | Nutrition       | Mother's Behavior           | JEEViKA+HL vs non SHG | 1.963 | 1.474 | 2.612 | 1 | 0 | 0 |
| FLW reminded on vaccine information                     | Immunization    | Frontlineworker Performance | JEEViKA+HL vs non SHG | 1.182 | 0.933 | 1.497 | 0 | 1 | 0 |
| FLW asked interest in having more children              | Family Planning | Frontlineworker Performance | JEEViKA+HL vs non SHG | 1.46  | 1.027 | 2.076 | 1 | 0 | 0 |
| FLW asked risk of becoming pregnant post-delivery       | Family Planning | Frontlineworker Performance | JEEViKA+HL vs non SHG | 1.514 | 1.078 | 2.125 | 1 | 0 | 0 |
| FLW advised on sterilization post-delivery              | Family Planning | Frontlineworker Performance | JEEViKA+HL vs non SHG | 1.441 | 1.041 | 1.994 | 1 | 0 | 0 |
| FLW advised on use of PPIUD post-delivery               | Family Planning | Frontlineworker Performance | JEEViKA+HL vs non SHG | 1.032 | 0.703 | 1.515 | 0 | 1 | 0 |

*Supplemental Table 1b Legend:*

All models presented were adjusted for age of the mother and the sex of the focal child. These models also accounted for the study's complex design by applying study weights. Abbreviations: ANC, antenatal care; CHS, Community-based Household Survey; CI Confidence Interval; DPT, diphtheria-pertussis-tetanus; FLW, frontline worker; HL, Health Layering; IFA, iron-folic acid; IPV, inactivated polio vaccine; OPV, oral polio vaccine; OR Odds Ratio; PPIUD, postpartum intrauterine device; SHG, self-help group



**Supplemental Table 1c. Effect of SHG interventions on reproductive, maternal, newborn and child health and nutrition indicators by continuum of care, CHS rounds 8-9 (2016-2017), comparing SHG members vs non-members in 433 JEEViKA blocks (OR +/- 95% CI).**

| Rounds 8 and 9, 2015-2017                                     |                          |                                    |                         |                     |                      |                      |                                                               |                                                              |                                                              |
|---------------------------------------------------------------|--------------------------|------------------------------------|-------------------------|---------------------|----------------------|----------------------|---------------------------------------------------------------|--------------------------------------------------------------|--------------------------------------------------------------|
| Description                                                   | Continuum of Care Domain | Delivery Platform                  | Effect                  | Odds Ratio Estimate | Lower 95% Confidence | Upper 95% Confidence | Higher odds for SHG in JEEViKA blocks compared to non members | Equal odds for SHG in JEEViKA blocks compared to non members | Lower odds for SHG in JEEViKA blocks compared to non members |
| 4+ ANC visits                                                 | Antenatal Care           | Facility/Outreach Service Delivery | JEEViKA only vs non SHG | 0.764               | 0.705                | 0.827                | 0                                                             | 0                                                            | 1                                                            |
| Had at least one ANC exam if reporting any ANC visit          | Antenatal Care           | Facility/Outreach Service Delivery | JEEViKA only vs non SHG | 0.577               | 0.347                | 0.959                | 0                                                             | 0                                                            | 1                                                            |
| Admitted to hospital for complication                         | Antenatal Care           | Facility/Outreach Service Delivery | JEEViKA only vs non SHG | 0.577               | 0.347                | 0.959                | 0                                                             | 0                                                            | 1                                                            |
| Received at least 90 IFA tablets during pregnancy             | Antenatal Care           | Facility/Outreach Service Delivery | JEEViKA only vs non SHG | 1.202               | 1.038                | 1.391                | 1                                                             | 0                                                            | 0                                                            |
| FLW antenatal home visit to discuss mother's or baby's health | Antenatal Care           | Frontlineworker Performance        | JEEViKA only vs non SHG | 1.24                | 1.156                | 1.33                 | 1                                                             | 0                                                            | 0                                                            |
| Any FLW visit during last trimester                           | Antenatal Care           | Frontlineworker Performance        | JEEViKA only vs non SHG | 1.254               | 1.167                | 1.348                | 1                                                             | 0                                                            | 0                                                            |
| FLW advised on hand-washing by delivery attendant             | Antenatal Care           | Frontlineworker Performance        | JEEViKA only vs non SHG | 1.156               | 1.039                | 1.286                | 1                                                             | 0                                                            | 0                                                            |
| FLW advised on danger of excessive bleeding                   | Antenatal Care           | Frontlineworker Performance        | JEEViKA only vs non SHG | 1.145               | 1.012                | 1.296                | 1                                                             | 0                                                            | 0                                                            |
| FLW advised on danger of convulsions                          | Antenatal Care           | Frontlineworker Performance        | JEEViKA only vs non SHG | 1.162               | 1.001                | 1.35                 | 1                                                             | 0                                                            | 0                                                            |
| FLW advised on danger of prolonged or difficult labor         | Antenatal Care           | Frontlineworker Performance        | JEEViKA only vs non SHG | 1.15                | 1.005                | 1.317                | 1                                                             | 0                                                            | 0                                                            |
| FLW advised on danger of swelling of face or hands            | Antenatal Care           | Frontlineworker Performance        | JEEViKA only vs non SHG | 1.133               | 0.994                | 1.292                | 0                                                             | 1                                                            | 0                                                            |
| FLW advised on reasons                                        | Antenatal Care           | Frontlineworker Performance        | JEEViKA only vs non SHG | 1.287               | 1.121                | 1.478                | 1                                                             | 0                                                            | 0                                                            |

|                                                        |                |                                    |                        |       |       |       |   |   |   |
|--------------------------------------------------------|----------------|------------------------------------|------------------------|-------|-------|-------|---|---|---|
| to deliver in a hospital                               |                |                                    |                        |       |       |       |   |   |   |
| FLW advised on saving money in case of emergency       | Antenatal Care | Frontlineworker Performance        | JEEViKA ony vs non SHG | 1.121 | 1.004 | 1.251 | 1 | 0 | 0 |
| Consumed 90+ IFA tablets                               | Antenatal Care | Mother's Behavior                  | JEEViKA ony vs non SHG | 0.978 | 0.805 | 1.188 | 0 | 1 | 0 |
| Pregnancy registration in the first trimester          | Antenatal Care | Mother's Behavior                  | JEEViKA ony vs non SHG | 1.109 | 1.033 | 1.191 | 1 | 0 | 0 |
| Sought care for complications                          | Antenatal Care | Mother's Behavior                  | JEEViKA ony vs non SHG | 0.851 | 0.786 | 0.922 | 0 | 0 | 1 |
| Saved money                                            | Antenatal Care | Mother's Behavior                  | JEEViKA ony vs non SHG | 1.122 | 1.037 | 1.214 | 1 | 0 | 0 |
| Chose a facility for delivery                          | Antenatal Care | Mother's Behavior                  | JEEViKA ony vs non SHG | 1.129 | 1.05  | 1.213 | 1 | 0 | 0 |
| Chose a facility in case of emergency                  | Antenatal Care | Mother's Behavior                  | JEEViKA ony vs non SHG | 0.931 | 0.852 | 1.017 | 0 | 1 | 0 |
| Arranged transportation to facility                    | Antenatal Care | Mother's Behavior                  | JEEViKA ony vs non SHG | 1.027 | 0.945 | 1.117 | 0 | 1 | 0 |
| Delivery in a private facility (out of all deliveries) | Delivery       | Facility/Outreach Service Delivery | JEEViKA ony vs non SHG | 0.589 | 0.53  | 0.654 | 0 | 0 | 1 |
| Caesarian-section for delivery                         | Delivery       | Facility/Outreach Service Delivery | JEEViKA ony vs non SHG | 0.673 | 0.578 | 0.785 | 0 | 0 | 1 |
| Clean cloth was used for baby                          | Delivery       | Facility/Outreach Service Delivery | JEEViKA ony vs non SHG | 1.078 | 0.798 | 1.456 | 0 | 1 | 0 |
| Clean thread was used to tie cord                      | Delivery       | Facility/Outreach Service Delivery | JEEViKA ony vs non SHG | 1.085 | 0.802 | 1.468 | 0 | 1 | 0 |
| Baby immediately dried and wrapped                     | Delivery       | Mother's Behavior                  | JEEViKA ony vs non SHG | 1.145 | 0.922 | 1.421 | 0 | 1 | 0 |
| Any FLW visits in the first week after delivery        | Postnatal Care | Frontlineworker Performance        | JEEViKA ony vs non SHG | 1.201 | 1.119 | 1.289 | 1 | 0 | 0 |
| 3+ FLW visits in the first week after delivery         | Postnatal Care | Frontlineworker Performance        | JEEViKA ony vs non SHG | 1.251 | 1.131 | 1.385 | 1 | 0 | 0 |
| FLW advised on neonatal danger signs                   | Postnatal Care | Frontlineworker Performance        | JEEViKA ony vs non SHG | 1.231 | 0.996 | 1.521 | 0 | 1 | 0 |
| FLW advised on delayed bathing                         | Postnatal Care | Frontlineworker Performance        | JEEViKA ony vs non SHG | 1.1   | 0.989 | 1.224 | 0 | 1 | 0 |
| FLW advised on skin to skin care                       | Postnatal Care | Frontlineworker Performance        | JEEViKA ony vs non SHG | 1.092 | 0.975 | 1.224 | 0 | 1 | 0 |
| FLW advised on dry cord care                           | Postnatal Care | Frontlineworker Performance        | JEEViKA ony vs non SHG | 1.142 | 1.022 | 1.277 | 1 | 0 | 0 |

|                                                       |                 |                                    |                         |       |       |       |   |   |   |
|-------------------------------------------------------|-----------------|------------------------------------|-------------------------|-------|-------|-------|---|---|---|
| Skin-to-skin care                                     | Postnatal Care  | Mother's Behavior                  | JEEViKA only vs non SHG | 1.211 | 1.109 | 1.323 | 1 | 0 | 0 |
| Dry cord care                                         | Postnatal Care  | Mother's Behavior                  | JEEViKA only vs non SHG | 1.039 | 0.968 | 1.115 | 0 | 1 | 0 |
| Care seeking for neonatal complications               | Postnatal Care  | Mother's Behavior                  | JEEViKA only vs non SHG | 1.066 | 0.902 | 1.258 | 0 | 1 | 0 |
| FLW advised on early initiation of breastfeeding      | Nutrition       | Frontlineworker Performance        | JEEViKA only vs non SHG |       |       |       | 0 | 0 | 1 |
| FLW advised on exclusive breastfeeding                | Nutrition       | Frontlineworker Performance        | JEEViKA only vs non SHG | 1.153 | 1.04  | 1.278 | 1 | 0 | 0 |
| FLW advised on age to which to continue breastfeeding | Nutrition       | Frontlineworker Performance        | JEEViKA only vs non SHG | 1.144 | 1.028 | 1.274 | 1 | 0 | 0 |
| Immediate breastfeeding                               | Nutrition       | Mother's Behavior                  | JEEViKA only vs non SHG | 1.304 | 1.205 | 1.41  | 1 | 0 | 0 |
| Exclusive breastfeeding in the past 24 hours          | Nutrition       | Mother's Behavior                  | JEEViKA only vs non SHG | 1.083 | 0.997 | 1.177 | 0 | 1 | 0 |
| FLW reminded on vaccine information                   | Immunization    | Frontlineworker Performance        | JEEViKA only vs non SHG | 1.059 | 0.976 | 1.149 | 0 | 1 | 0 |
| Have immunisation card                                | Immunization    | Facility/Outreach Service Delivery | JEEViKA only vs non SHG |       |       |       | 0 | 0 | 1 |
| Polio (OPV3 or IPV) by card                           | Immunization    | Facility/Outreach Service Delivery | JEEViKA only vs non SHG |       |       |       | 0 | 0 | 1 |
| DPT3 by card                                          | Immunization    | Facility/Outreach Service Delivery | JEEViKA only vs non SHG |       |       |       | 0 | 0 | 1 |
| FLW asked interest in having more children            | Family Planning | Frontlineworker Performance        | JEEViKA only vs non SHG | 1.261 | 1.104 | 1.441 | 1 | 0 | 0 |
| FLW asked risk of becoming pregnant                   | Family Planning | Frontlineworker Performance        | JEEViKA only vs non SHG | 1.307 | 1.155 | 1.478 | 1 | 0 | 0 |
| post-delivery FLW advised on sterilization            | Family Planning | Frontlineworker Performance        | JEEViKA only vs non SHG | 1.559 | 1.39  | 1.748 | 1 | 0 | 0 |
| post-delivery FLW advised on use of PPIUD             | Family Planning | Frontlineworker Performance        | JEEViKA only vs non SHG | 1.291 | 1.133 | 1.472 | 1 | 0 | 0 |
| Modern method of contraception used                   | Family Planning | Mother's Behavior                  | JEEViKA only vs non SHG | 1.339 | 1.231 | 1.457 | 1 | 0 | 0 |
| Washed hands before feeding child                     | Sanitation      | Mother's Behavior                  | JEEViKA only vs non SHG | 0.992 | 0.899 | 1.095 | 0 | 1 | 0 |

|                                                        |            |                   |                         |       |       |       |   |   |   |
|--------------------------------------------------------|------------|-------------------|-------------------------|-------|-------|-------|---|---|---|
| Washed hands after using toilet                        | Sanitation | Mother's Behavior | JEEViKA only vs non SHG | 1.64  | 0.977 | 2.754 | 0 | 1 | 0 |
| Used soap or detergent when washing hands before feed  | Sanitation | Mother's Behavior | JEEViKA only vs non SHG | 0.961 | 0.9   | 1.027 | 0 | 1 | 0 |
| Used soap or detergent when washing hands after toilet | Sanitation | Mother's Behavior | JEEViKA only vs non SHG | 1.062 | 0.99  | 1.14  | 0 | 1 | 0 |

*Supplemental Table 1c Legend:*

All models presented were adjusted for age of the mother and the sex of the focal child. These models also accounted for the study's complex design by applying study weights. Abbreviations: ANC, antenatal care; CHS, Community-based Household Survey; CI Confidence Interval; DPT, diphtheria-pertussis-tetanus; FLW, frontline worker; HL, Health Layering; IFA, iron-folic acid; IPV, inactivated polio vaccine; OPV, oral polio vaccine; OR Odds Ratio; PPIUD, postpartum intrauterine device; SHG, self-help group

| Supplemental Table 2. Comparison of reproductive, maternal, newborn and child health and nutrition indicators for SHG members in 101 health-layered blocks compared to 433 JEEViKA 433 blocks, CHS rounds 8-9, 2015-2017 |                          |                                    |                         |                     |                      |                      |                                                                     |                                                                    |                                                                    |
|--------------------------------------------------------------------------------------------------------------------------------------------------------------------------------------------------------------------------|--------------------------|------------------------------------|-------------------------|---------------------|----------------------|----------------------|---------------------------------------------------------------------|--------------------------------------------------------------------|--------------------------------------------------------------------|
| Description                                                                                                                                                                                                              | Continuum of care domain | Delivery Platform                  | Effect                  | Odds Ratio Estimate | Lower 95% Confidence | Upper 95% Confidence | Higher odds for Health layering + JEEViKA compared to JEEViKA alone | Equal odds for Health layering + JEEViKA compared to JEEViKA alone | Lower odds for Health layering + JEEViKA compared to JEEViKA alone |
| 4+ ANC visits                                                                                                                                                                                                            | Antenatal Care           | Facility/Outreach Service Delivery | JEEViKA +HL vs SHG only | 0.715               | 0.618                | 0.827                | 0                                                                   | 0                                                                  | 1                                                                  |
| Had at least one ANC exam if reporting any ANC visit                                                                                                                                                                     | Antenatal Care           | Facility/Outreach Service Delivery | JEEViKA +HL vs SHG only | 1.594               | 0.815                | 3.117                | 0                                                                   | 1                                                                  | 0                                                                  |
| Admitted to hospital for complication                                                                                                                                                                                    | Antenatal Care           | Facility/Outreach Service Delivery | JEEViKA +HL vs SHG only | 1.594               | 0.815                | 3.117                | 0                                                                   | 1                                                                  | 0                                                                  |
| Received at least 90 IFA tablets during pregnancy                                                                                                                                                                        | Antenatal Care           | Facility/Outreach Service Delivery | JEEViKA +HL vs SHG only | 1.087               | 0.883                | 1.338                | 0                                                                   | 1                                                                  | 0                                                                  |
| Delivery in a facility (public or private)                                                                                                                                                                               | Delivery                 | Facility/Outreach Service Delivery | JEEViKA +HL vs SHG only | 1.262               | 1.116                | 1.428                | 1                                                                   | 0                                                                  | 0                                                                  |
| Delivery in a private facility (out of all deliveries)                                                                                                                                                                   | Delivery                 | Facility/Outreach Service Delivery | JEEViKA +HL vs SHG only | 0.926               | 0.776                | 1.106                | 0                                                                   | 1                                                                  | 0                                                                  |
| Delivery in a public facility (out of all deliveries)                                                                                                                                                                    | Delivery                 | Facility/Outreach Service Delivery | JEEViKA +HL vs SHG only | 1.167               | 0.974                | 1.399                | 0                                                                   | 1                                                                  | 0                                                                  |
| Caesarian-section for delivery                                                                                                                                                                                           | Delivery                 | Facility/Outreach Service Delivery | JEEViKA +HL vs SHG only | 0.866               | 0.669                | 1.121                | 0                                                                   | 1                                                                  | 0                                                                  |
| New blade was used to cut cord                                                                                                                                                                                           | Delivery                 | Facility/Outreach Service Delivery | JEEViKA +HL vs SHG only | 0.849               | 0.306                | 2.359                | 0                                                                   | 1                                                                  | 0                                                                  |
| Clean cloth was used for baby                                                                                                                                                                                            | Delivery                 | Facility/Outreach Service Delivery | JEEViKA +HL vs SHG only | 1.404               | 0.914                | 2.157                | 0                                                                   | 1                                                                  | 0                                                                  |
| Clean thread was used to tie cord                                                                                                                                                                                        | Delivery                 | Facility/Outreach Service Delivery | JEEViKA +HL vs SHG only | 1.232               | 0.737                | 2.059                | 0                                                                   | 1                                                                  | 0                                                                  |
| Baby weighed at birth                                                                                                                                                                                                    | Delivery                 | Facility/Outreach Service Delivery | JEEViKA +HL vs SHG only | 1.217               | 1.078                | 1.373                | 1                                                                   | 0                                                                  | 0                                                                  |
| FLW antenatal home visit to discuss mother's or baby's health                                                                                                                                                            | Antenatal Care           | Frontlineworker Performance        | JEEViKA +HL vs SHG only | 1.41                | 1.266                | 1.57                 | 1                                                                   | 0                                                                  | 0                                                                  |
| Any FLW visit during last trimester                                                                                                                                                                                      | Antenatal Care           | Frontlineworker Performance        | JEEViKA +HL vs SHG only | 1.323               | 1.187                | 1.476                | 1                                                                   | 0                                                                  | 0                                                                  |

|                                                       |                |                             |                         |       |       |       |   |   |   |
|-------------------------------------------------------|----------------|-----------------------------|-------------------------|-------|-------|-------|---|---|---|
| FLW advised on hand-washing by delivery attendant     | Antenatal Care | Frontlineworker Performance | JEEViKA +HL vs SHG only | 1.541 | 1.322 | 1.796 | 1 | 0 | 0 |
| FLW advised on danger of excessive bleeding           | Antenatal Care | Frontlineworker Performance | JEEViKA +HL vs SHG only | 1.102 | 0.913 | 1.33  | 0 | 1 | 0 |
| FLW advised on danger of convulsions                  | Antenatal Care | Frontlineworker Performance | JEEViKA +HL vs SHG only | 1.149 | 0.915 | 1.443 | 0 | 1 | 0 |
| FLW advised on danger of prolonged or difficult labor | Antenatal Care | Frontlineworker Performance | JEEViKA +HL vs SHG only | 1.308 | 1.072 | 1.596 | 1 | 0 | 0 |
| FLW advised on danger of swelling of face or hands    | Antenatal Care | Frontlineworker Performance | JEEViKA +HL vs SHG only | 1.347 | 1.117 | 1.624 | 1 | 0 | 0 |
| FLW advised on reasons to deliver in a hospital       | Antenatal Care | Frontlineworker Performance | JEEViKA +HL vs SHG only | 0.978 | 0.781 | 1.225 | 0 | 1 | 0 |
| FLW advised on saving money in case of emergency      | Antenatal Care | Frontlineworker Performance | JEEViKA +HL vs SHG only | 1.232 | 1.049 | 1.446 | 1 | 0 | 0 |
| Any FLW visits in the first week after delivery       | Postnatal Care | Frontlineworker Performance | JEEViKA +HL vs SHG only | 1.325 | 1.19  | 1.477 | 1 | 0 | 0 |
| 3+ FLW visits in the first week after delivery        | Postnatal Care | Frontlineworker Performance | JEEViKA +HL vs SHG only | 1.278 | 1.099 | 1.487 | 1 | 0 | 0 |
| FLW advised on neonatal danger signs                  | Postnatal Care | Frontlineworker Performance | JEEViKA +HL vs SHG only | 1.222 | 0.921 | 1.623 | 0 | 1 | 0 |
| FLW advised on delayed bathing                        | Postnatal Care | Frontlineworker Performance | JEEViKA +HL vs SHG only | 1.323 | 1.13  | 1.548 | 1 | 0 | 0 |
| FLW advised on skin to skin care                      | Postnatal Care | Frontlineworker Performance | JEEViKA +HL vs SHG only | 1.531 | 1.297 | 1.808 | 1 | 0 | 0 |
| FLW advised on dry cord care                          | Postnatal Care | Frontlineworker Performance | JEEViKA +HL vs SHG only | 1.56  | 1.329 | 1.832 | 1 | 0 | 0 |
| FLW advised on early initiation of breastfeeding      | Nutrition      | Frontlineworker Performance | JEEViKA +HL vs SHG only | 1.799 | 1.227 | 2.637 | 1 | 0 | 0 |
| FLW advised on exclusive breastfeeding                | Nutrition      | Frontlineworker Performance | JEEViKA +HL vs SHG only | 1.348 | 1.158 | 1.57  | 1 | 0 | 0 |
| FLW advised on age to which to continue breastfeeding | Nutrition      | Frontlineworker Performance | JEEViKA +HL vs SHG only | 1.629 | 1.397 | 1.899 | 1 | 0 | 0 |
| FLW reminded on vaccine information                   | Immunization   | Frontlineworker Performance | JEEViKA +HL vs SHG only | 1.125 | 0.987 | 1.283 | 0 | 1 | 0 |

|                                                     |                 |                             |                         |       |       |        |   |   |   |
|-----------------------------------------------------|-----------------|-----------------------------|-------------------------|-------|-------|--------|---|---|---|
| FLW asked interest in having more children          | Family Planning | Frontlineworker Performance | JEEViKA +HL vs SHG only | 1.252 | 1.04  | 1.506  | 1 | 0 | 0 |
| FLW asked risk of becoming pregnant post-delivery   | Family Planning | Frontlineworker Performance | JEEViKA +HL vs SHG only | 1.245 | 1.044 | 1.485  | 1 | 0 | 0 |
| FLW advised on sterilization post-delivery          | Family Planning | Frontlineworker Performance | JEEViKA +HL vs SHG only | 1.153 | 0.98  | 1.357  | 0 | 1 | 0 |
| FLW advised on use of PPIUD post-delivery           | Family Planning | Frontlineworker Performance | JEEViKA +HL vs SHG only | 1.172 | 0.973 | 1.412  | 0 | 1 | 0 |
| Consumed 90+ IFA tablets                            | Antenatal Care  | Mother's Behavior           | JEEViKA +HL vs SHG only | 1.279 | 0.968 | 1.689  | 0 | 1 | 0 |
| Pregnancy registration in the first trimester       | Antenatal Care  | Mother's Behavior           | JEEViKA +HL vs SHG only | 1.043 | 0.933 | 1.165  | 0 | 1 | 0 |
| Sought care for complications                       | Antenatal Care  | Mother's Behavior           | JEEViKA +HL vs SHG only | 1.131 | 0.992 | 1.288  | 0 | 1 | 0 |
| Saved money                                         | Antenatal Care  | Mother's Behavior           | JEEViKA +HL vs SHG only | 1.162 | 1.028 | 1.313  | 1 | 0 | 0 |
| Chose a facility for delivery                       | Antenatal Care  | Mother's Behavior           | JEEViKA +HL vs SHG only | 1.26  | 1.122 | 1.415  | 1 | 0 | 0 |
| Chose a facility in case of emergency               | Antenatal Care  | Mother's Behavior           | JEEViKA +HL vs SHG only | 1.17  | 1.026 | 1.334  | 1 | 0 | 0 |
| Arranged transportation to facility                 | Antenatal Care  | Mother's Behavior           | JEEViKA +HL vs SHG only | 1.308 | 1.158 | 1.478  | 1 | 0 | 0 |
| Baby immediately dried and wrapped                  | Delivery        | Mother's Behavior           | JEEViKA +HL vs SHG only | 0.93  | 0.678 | 1.276  | 0 | 1 | 0 |
| Skin-to-skin care                                   | Postnatal Care  | Mother's Behavior           | JEEViKA +HL vs SHG only | 1.28  | 1.118 | 1.465  | 1 | 0 | 0 |
| Dry cord care                                       | Postnatal Care  | Mother's Behavior           | JEEViKA +HL vs SHG only | 1.358 | 1.217 | 1.516  | 1 | 0 | 0 |
| Care seeking for neonatal complications             | Postnatal Care  | Mother's Behavior           | JEEViKA +HL vs SHG only | 1.599 | 1.161 | 2.203  | 1 | 0 | 0 |
| Immediate breastfeeding                             | Nutrition       | Mother's Behavior           | JEEViKA +HL vs SHG only | 1.338 | 1.185 | 1.51   | 1 | 0 | 0 |
| Exclusive breastfeeding in the past 24 hours        | Nutrition       | Mother's Behavior           | JEEViKA +HL vs SHG only | 1.379 | 1.203 | 1.58   | 1 | 0 | 0 |
| Initiation of complementary feeding                 | Nutrition       | Mother's Behavior           | JEEViKA +HL vs SHG only | 0.613 | 0.252 | 1.491  | 0 | 1 | 0 |
| Age-appropriate initiation of complementary feeding | Nutrition       | Mother's Behavior           | JEEViKA +HL vs SHG only | 2.369 | 0.306 | 18.332 | 0 | 1 | 0 |

|                                                                                                                                                                                                                                                                                                                                                                                                                                                                                                                            |                 |                   |                         |       |       |       |   |   |   |
|----------------------------------------------------------------------------------------------------------------------------------------------------------------------------------------------------------------------------------------------------------------------------------------------------------------------------------------------------------------------------------------------------------------------------------------------------------------------------------------------------------------------------|-----------------|-------------------|-------------------------|-------|-------|-------|---|---|---|
| (6-8 months of age)                                                                                                                                                                                                                                                                                                                                                                                                                                                                                                        |                 |                   |                         |       |       |       |   |   |   |
| Age-appropriate frequency of complementary feeding (3+ times for 9-11 month-old children)                                                                                                                                                                                                                                                                                                                                                                                                                                  | Nutrition       | Mother's Behavior | JEEViKA +HL vs SHG only | 0.724 | 0.26  | 2.017 | 0 | 1 | 0 |
| Fed complementary cereal-based food in past 24 hours                                                                                                                                                                                                                                                                                                                                                                                                                                                                       | Nutrition       | Mother's Behavior | JEEViKA +HL vs SHG only | 0.609 | 0.25  | 1.481 | 0 | 1 | 0 |
| Modern method of contraception used                                                                                                                                                                                                                                                                                                                                                                                                                                                                                        | Family Planning | Mother's Behavior | JEEViKA +HL vs SHG only | 1.848 | 0.687 | 4.97  | 0 | 1 | 0 |
| Modern method of contraception used                                                                                                                                                                                                                                                                                                                                                                                                                                                                                        | Family Planning | Mother's Behavior | JEEViKA +HL vs SHG only | 1.848 | 0.687 | 4.97  | 0 | 1 | 0 |
| Washed hands before feeding child                                                                                                                                                                                                                                                                                                                                                                                                                                                                                          | Sanitation      | Mother's Behavior | JEEViKA +HL vs SHG only | 1.407 | 0.327 | 6.062 | 0 | 1 | 0 |
| Used soap or detergent when washing hands before feed                                                                                                                                                                                                                                                                                                                                                                                                                                                                      | Sanitation      | Mother's Behavior | JEEViKA +HL vs SHG only | 0.659 | 0.267 | 1.631 | 0 | 1 | 0 |
| Used soap or detergent when washing hands after toilet                                                                                                                                                                                                                                                                                                                                                                                                                                                                     | Sanitation      | Mother's Behavior | JEEViKA +HL vs SHG only | 0.249 | 0.056 | 1.104 | 0 | 1 | 0 |
| <i>Supplemental Table 2 Legend:</i>                                                                                                                                                                                                                                                                                                                                                                                                                                                                                        |                 |                   |                         |       |       |       |   |   |   |
| All models presented were adjusted for age of the mother and the sex of the focal child. These models also accounted for the study's complex design by applying study weights. Abbreviations: ANC, antenatal care; CHS, Community-based Household Survey; CI Confidence Interval; DPT, diphtheria-pertussis-tetanus; FLW, frontline worker; HL, Health Layering; IFA, iron-folic acid; IPV, inactivated polio vaccine; OPV, oral polio vaccine; OR Odds Ratio; PPIUD, postpartum intrauterine device; SHG, self-help group |                 |                   |                         |       |       |       |   |   |   |
| JEEViKA+HL vs SHG only is an indicator which compares SHG members in the 101 blocks with Health Layering either Parivartan or JEEViKA + HL to SHG members in the 433 blocks with JEEViKA alone, Round 8 and 9, 2015-2017 only                                                                                                                                                                                                                                                                                              |                 |                   |                         |       |       |       |   |   |   |



| <b>Supplemental Table 3. Timeline of Interventions and Evaluations</b>                                                                                                                                                                                                                                                                                                                                                                                                                  |                                          |                                                                        |                               |                                              |
|-----------------------------------------------------------------------------------------------------------------------------------------------------------------------------------------------------------------------------------------------------------------------------------------------------------------------------------------------------------------------------------------------------------------------------------------------------------------------------------------|------------------------------------------|------------------------------------------------------------------------|-------------------------------|----------------------------------------------|
| <b>Time- Evaluation Rounds</b>                                                                                                                                                                                                                                                                                                                                                                                                                                                          | <b>64 blocks- Parivartan</b>             | <b>37 blocks JEEViKA+ Health (101 total) (round 6 only, control 2)</b> | <b>256 Light touch blocks</b> | <b>433 blocks, rest of bihar (control 1)</b> |
| Round 6- May 2104- Sept 2014                                                                                                                                                                                                                                                                                                                                                                                                                                                            | Active                                   | JEEViKA                                                                | JEEViKA                       | JEEViKA                                      |
| Round 7 Sept 2015- December 2015                                                                                                                                                                                                                                                                                                                                                                                                                                                        | Active                                   | Transition                                                             | Transition                    | JEEViKA                                      |
| Round 8 October 2015- Jan 2016                                                                                                                                                                                                                                                                                                                                                                                                                                                          | Active                                   | Active                                                                 | JEEViKA or Active?            | JEEViKA                                      |
| Round 9 October 2016- Jan 2017                                                                                                                                                                                                                                                                                                                                                                                                                                                          | Phase out- transition to JEEViKA+ Health | Active                                                                 | Active                        | JEEViKA                                      |
| <p>Comparison 1: SHG to non SHG in 64 Parivartan blocks (Rounds 6- 9 together)<br/>           Comparison 2: SHG to non SHG in 37 JEEViKA + Health blocks (Rounds 6- 9 together)<br/>           Comparison 3: SHG to non SHG in 433 JEEViKA blocks (Rounds 6- 9 together)<br/>           Comparison 4: SHG members in 101 Health-layered blocks (Parivartan and JEEViKA+HL) compared to SHG members in JEEViKA in 433 blocks in the rest of Bihar<br/>           SHG=Self Help Group</p> |                                          |                                                                        |                               |                                              |
